# Supplementary material
Source: publisher site journal article supplement (https://www.dovepress.com/article/433351)
Supplement: Supplementary file 1 [file get_supplementary_file.php]

**Supplementary Table S1. Areas Under the ROC Curves for all parameters of applications, subgrouping by AHI ≥ 5, 15, 30**

|  | AHI ≥ 5 | | | | | AHI ≥ 15 | | | | | AHI ≥ 30 | | | | |
| --- | --- | --- | --- | --- | --- | --- | --- | --- | --- | --- | --- | --- | --- | --- | --- |
|  | AUC | *p* value | Cutoff | Sen | Spec | AUC | *p* value | Cutoff | Sen | Spec | AUC | *p* value | Cutoff | Sen | Spec |
| **SnoreLab (SL)** |  |  |  |  |  |  |  |  |  |  |  |  |  |  |  |
| Snore Score | 0.975 | 0.024** | 1.5 | 0.94 | 1.00 | 0.881 | 0.000** | 5.5 | 0.927 | 0.818 | 0.692 | 0.020* | 20 | 0.935 | 0.571 |
| Time Snoring (mins) | 0.990 | 0.02** | 4 | 0.98 | 1.00 | 0.896 | 0.000** | 44.5 | 0.902 | 0.818 | 0.710 | 0.011* | 65 | 0.935 | 0.571 |
| **Anti Snore Solution (ASS)** |  |  |  |  |  |  |  |  |  |  |  |  |  |  |  |
| Snoring Counts (times) | 0.960 | 0.029** | 0.5 | 0.92 | 1.00 | 0.853 | 0.000** | 972 | 0.659 | 0.909 | 0.667 | 0.042* | 0.5 | 1 | 0.286 |
| Snoring Duration (mins) | 0.960 | 0.029** | 0.5 | 0.92 | 1.00 | 0.854 | 0.000** | 81.5 | 0.659 | 0.909 | 0.671 | 0.038* | 0.5 | 1 | 0.286 |
| **Sleep Cycle Alarm (SCA)** |  |  |  |  |  |  |  |  |  |  |  |  |  |  |  |
| Sleep Quality | 0.690 | 0.366 | 71.5 | 0.5 | 1.00 | 0.827 | 0.001** | 82.5 | 0.951 | 0.636 | 0.826 | 0.000** | 77.5 | 0.935 | 0.571 |

* Correlation is significant at the 0.05 level (2-tailed).

** Correlation is significant at the 0.01 level (2-tailed).

**Abbreviations:** ROC curve, receiver operating characteristic curve; AHI, apnea hypopnea index; AUC, area under the curve; Sen, sensitivity; Spec, specificity
